# Supplementary material for: BAWLD-CH 4 : a comprehensive dataset of methane fluxes from boreal and arctic ecosystems
Source: Copernicus journal article supplement (doi:10.5194/essd-13-5151-2021), 2021-11-05
Supplement: Supplementary file 1 [file essd-13-5151-2021-supplement.pdf]

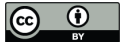

*Supplement of*

## **BAWLD-CH<sub>4</sub>: a comprehensive dataset of methane fluxes from boreal and arctic ecosystems**

**McKenzie A. Kuhn et al.**

*Correspondence to:* McKenzie A. Kuhn ([kuhn.mckenzie@gmail.com](mailto:kuhn.mckenzie@gmail.com))

The copyright of individual parts of the supplement might differ from the article licence.

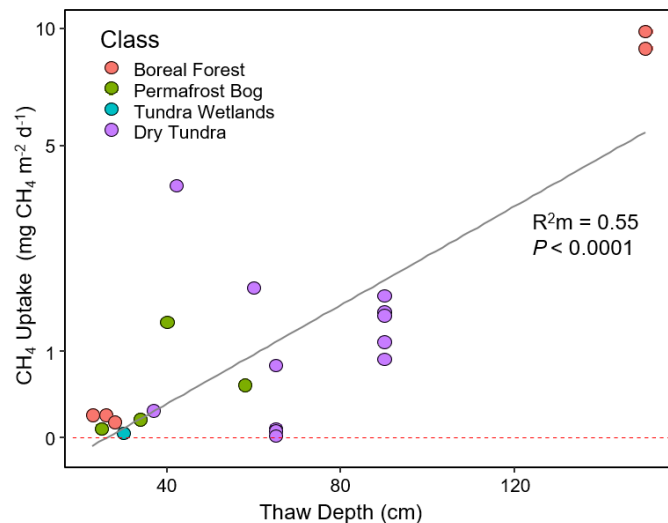

**Figure S1. Correlation between thaw depth and methane uptake.** Positive numbers represent net uptake from the atmosphere. Colors represented different ecosystem class. Neutral (i.e. zero) fluxes were not included in the regression analyses.

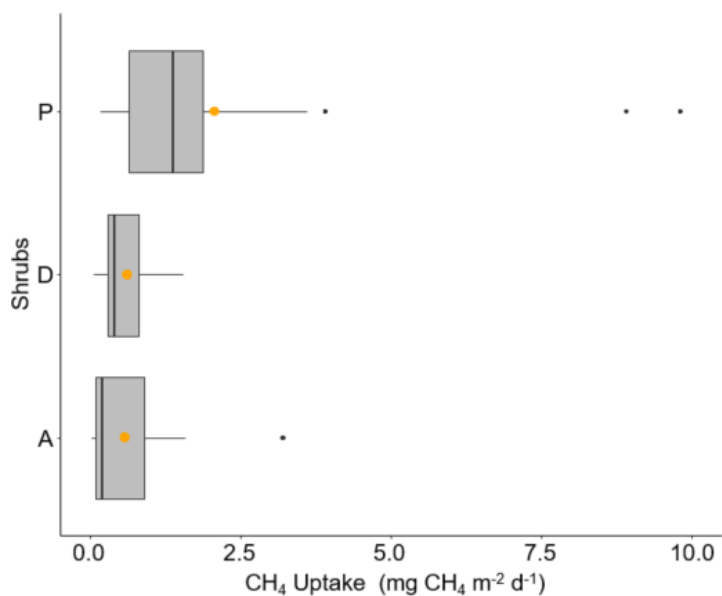

**Figure S2. Boxplots of CH<sub>4</sub> uptake as a factor of shrub cover.** Positive numbers represent net uptake from the atmosphere. Orange dots represent mean uptake within a given category. P = Present; D = Dominant; A = Absent. Neutral fluxes were not included in the boxplots.

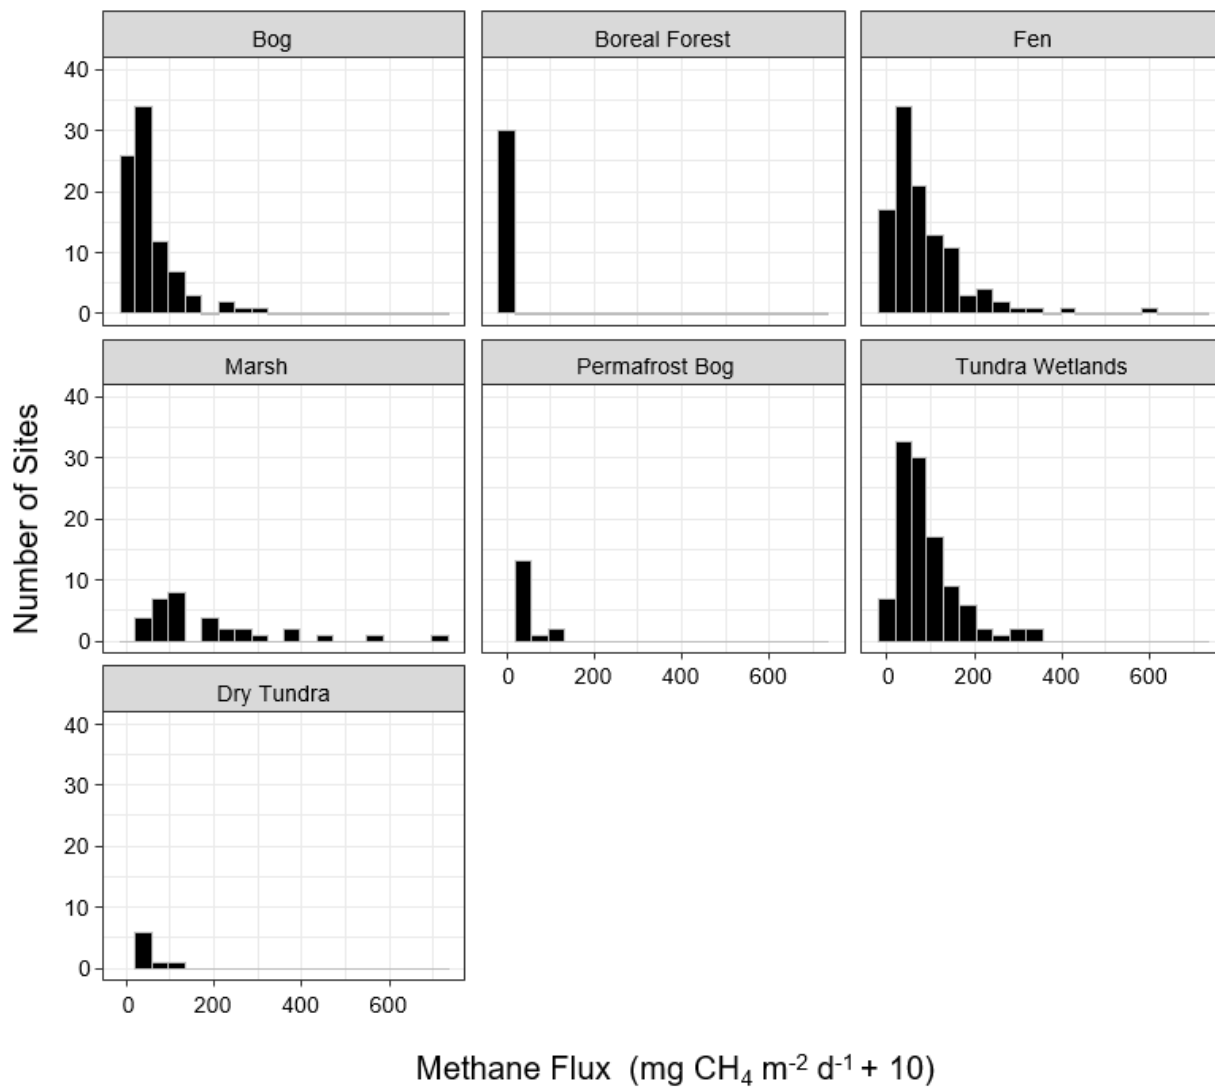

**Figure S3. Non-transformed flux frequencies across the terrestrial ecosystem classes. A constant of 10 was added to include CH<sub>4</sub> uptake.**

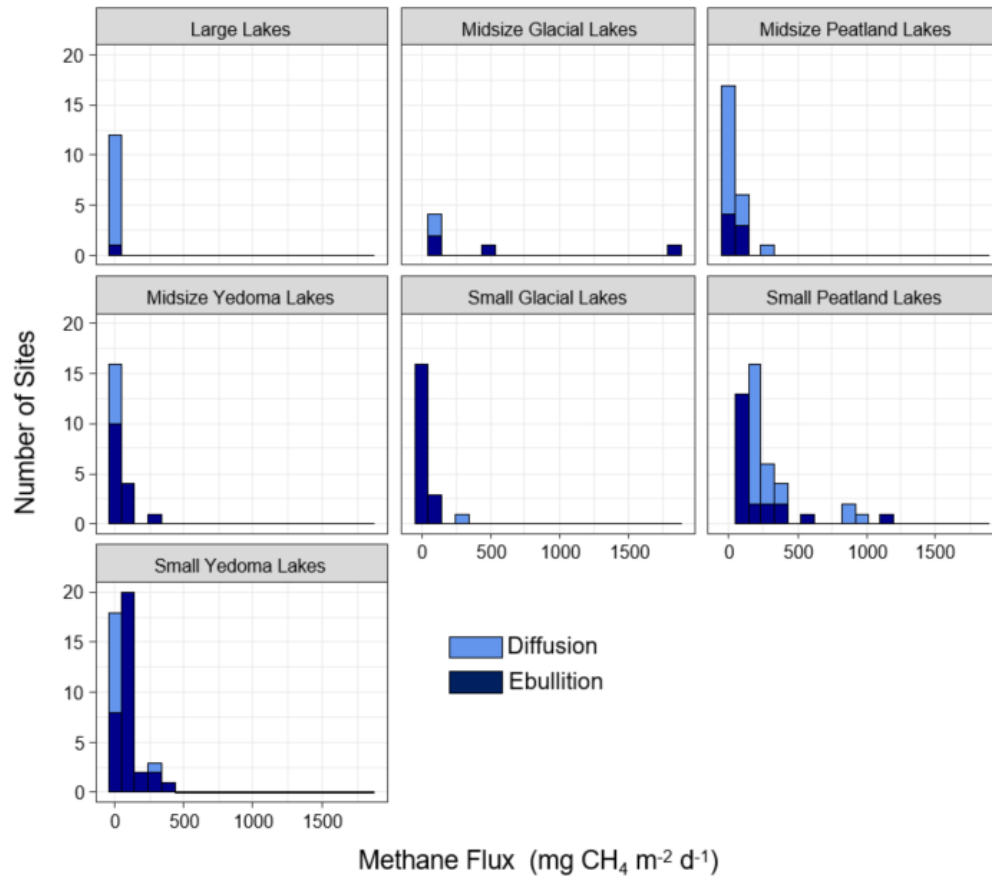

**Figure S4. Non-transformed flux frequencies across the aquatic land cover classes.**

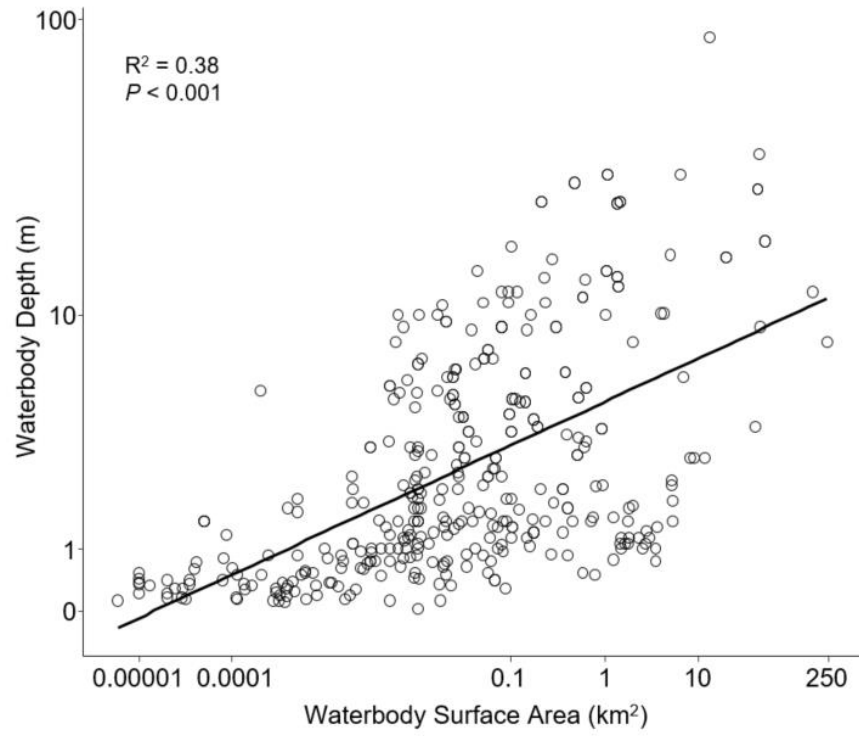

**Figure S5. Relationship between waterbody surface area and water column depth.**

**Table S1. Temperature sensitivities of methane fluxes (Q<sub>10</sub> values) across terrestrial and aquatic ecosystem classes.** Individual classes without Q<sub>10</sub> values did not have significant relationships with temperature when analyzed on their own or did not have a large enough sample size (n = 15).

| <b>Class or group of classes</b>                                          | <b>Q10</b> |
|---------------------------------------------------------------------------|------------|
| All terrestrial class                                                     | 2.88       |
| “Wet” terrestrial classes (Marshes, Tundra Wetlands, Fens, Bogs)          | 2.82       |
| “Dry” terrestrial classes (Dry Tundra and Boreal Forest, Permafrost Bogs) | 3.71       |
| Marshes                                                                   | -          |
| Tundra Wetlands                                                           | 2.57       |
| Fens                                                                      | 1.99       |
| Bogs                                                                      | 3.39       |
| Permafrost Bogs                                                           | -          |
| Dry Tundra                                                                | 2.63       |
| Boreal Forest                                                             | -          |
| All aquatic classes diffusion                                             | 4.27       |
| All peatland lakes diffusion                                              | 2.63       |
| All yedoma lakes diffusion                                                | 3.89       |
| All glacial lakes diffusion                                               | -          |
| All aquatic class ebullition                                              | 2.40       |

**Table S2: Model selection for terrestrial CH<sub>4</sub> emissions.** “Site” represents the best model using site level predictor variables (biophysical variables measured directly by the authors). “Region” represents the best model using predictor variables that can be attributed across larger spatial scales and extracted from gridded or mapped products. Tests with “site and region” represent the model models that include both site level and regional level predictors. The null model includes only the random effect of SiteID. The best models for each test represented here were picked through forward model selection. K = number of fixed terms the model, AICc = size-corrected Akaike information criterion, DeltaAICc = change in AICc between a given model and the best model, AICcwt = AICc weights indicating the probability a given model is the most parsimonious model in the group of models tested, R<sup>2</sup>m = marginal R<sup>2</sup> for the fixed terms for mixed models. R<sup>2</sup>c = conditional R<sup>2</sup> for fixed and random terms for mixed effects models. See main text for explanation of fixed effects short names. Non-significant fixed terms that were tested include: MAAT, MAP, Permafrost Zone, Permafrost Presence or Absence, and Biome. TsoilB = soil temperature at 2-25 cm. WTA<sub>v</sub> – average water table position. Sedge = graminoid cover.

| Variable modeled                                   | Test          | Fixed effect                                  | K  | AICc   | DeltaAICc | AICcwt | R <sup>2</sup> m/R <sup>2</sup> c |
|----------------------------------------------------|---------------|-----------------------------------------------|----|--------|-----------|--------|-----------------------------------|
| <b>Terrestrial Log.CH<sub>4</sub>.Flux (n=206)</b> | Site*region   | TsoilB*Class+ WTA <sub>v</sub> *Class + Sedge | 25 | 98.87  | 0         |        | 0.73/0.83                         |
|                                                    | Site + region | TsoilB + WTA <sub>v</sub> + Sedge + Class     | 13 | 99.70  | 0.84      |        | 0.69/0.81                         |
|                                                    | Site          | TsoilB + WTA <sub>v</sub> + Sedge             | 7  | 131.20 | 32.34     |        | 0.54/0.78                         |
|                                                    | Region        | Class                                         | 9  | 172.77 | 73.91     |        | 0.55/0.71                         |
|                                                    | Null          | -                                             | 3  | 275.8  | 176.92    |        | 0/0.72                            |

**Table S3: Model selection for aquatic diffusive CH<sub>4</sub> emissions.** “Site” represents the best model using site level predictor variables (biophysical variables measured directly by the authors). “Region” represents the best model using predictor variables that can be attributed across larger spatial scales and extracted from gridded or mapped products. Tests with “site and region” represent the model models that include both site level and regional level predictors. The null model was ran as follows  $\ln(\log.CH4.flux) \sim 1$ . The best models for each test represented here were picked through forward model selection. K = number of fixed terms the model, AICc = size-corrected Akaike information criterion, DeltaAICc = change in AICc between a given model and the best model, AICcwt = AICc weights indicating the probability a given model is the most parsimonious model in the group of models tested, R<sup>2</sup>m = marginal R<sup>2</sup> for the fixed terms for mixed models. See main text for explanation of predictor variable short names. Non-significant predictor terms that were tested include MAP, Permafrost Zone, DOC, Biome, waterbody depth, and Class). SA = waterbody surface area. TYPE = overarching lake type by lake genesis. TEMP = measured water temperature. GRID\_T = gridded mean annual temperature. LAT = latitude.

| Variable modeled                             | Test             | Predictor variable           | K | AICc  | DeltaAICc | AICcwt | Adj R <sup>2</sup> |
|----------------------------------------------|------------------|------------------------------|---|-------|-----------|--------|--------------------|
| Aquatic diffusion<br>Log.CH4.Flux<br>(n=149) | Site*Region      | log10(SA)*TYPE<br>+ TEMP     | 8 | 162.5 | 0         | 0.79   | 0.41               |
|                                              | Site             | log10(SA) +<br>TEMP          | 4 | 165.8 | 3.3       | 0.94   | 0.36               |
|                                              | Site +<br>Region | log10(SA) +<br>TEMP + GRID_T | 7 | 167.5 | 5.0       | 1.0    | 0.38               |
|                                              | Region           | GRID_T + TYPE<br>+ LAT       | 6 | 201.7 | 39.2      | 1.0    | 0.35               |
|                                              | Null             | -                            | 3 | 215.1 | 52.6      | 1.0    | -                  |



**Table S4. Joint analysis of terrestrial and aquatic growing season/ice-free emissions.** The best models for each test represented here were picked through forward model selection. K = number of fixed terms the model, AICc = size-corrected Akaike information criterion, DeltaAICc = change in AICc between a given model and the best model, AICcwt = AICc weights indicating the probability a given model is the most parsimonious model in the group of models tested, R<sup>2</sup>m = marginal R<sup>2</sup> for the fixed terms for mixed models. R<sup>2</sup>c = conditional R<sup>2</sup> for fixed and random terms for mixed effects models. GRID\_P = gridded mean annual precipitation. GRID\_T = gridded mean annual temperature.

| Variable modeled        | Fixed effect                              | K  | AICc   | DeltaAICc | AICcwt | R <sup>2</sup> m |
|-------------------------|-------------------------------------------|----|--------|-----------|--------|------------------|
| Log.CH4.Flux<br>(n=793) | Class +<br>GRID_T                         | 17 | 959.8  | 0         | 0.64   | 0.47             |
|                         | Class +<br>GRID_T +<br>Biome              | 18 | 961.6  | 1.83      | 0.25   | 0.47             |
|                         | Class +<br>Grid_T +<br>Permafrost<br>Zone | 21 | 963.3  | 3.53      | 0.11   | 0.47             |
|                         | Class +<br>GRID_P +<br>Permafrost<br>Zone | 21 | 977.3  | 17.5      | 0      | 0.46             |
|                         | Class +<br>GRID_P                         | 17 | 979.5  | 19.7      | 0      | 0.44             |
|                         | Class +<br>Permafrost<br>Zone             | 20 | 994.4  | 34.7      | 0      | 0.46             |
|                         | Class                                     | 16 | 996.4  | 36.6      | 0      | 0.44             |
|                         | Null                                      | 3  | 1276.7 | 316.9     | 0      | -                |
